# Supplementary material for: Adaption to Tianjin, China, Based on a Retrospective Pattern Study on the Petrochemical Industry Development and the Correlated Process of SO2 Abatement in Yokkaichi, Japan
Source: MDPI journal article supplement (doi:10.3390/su15010498), 2022-12-28
Supplement: s1 [file s1]

## Supplementary materials

**Table S1.** Some abbreviations appeared in this paper and demonstrations.

| Abbreviation      | Demonstration                     |
|-------------------|-----------------------------------|
| AAC               | Annual Average Concentration      |
| ATE               | Annual Total Emission             |
| AISE              | Annual Industrial Source Emission |
| ISV               | Industrial Shipment Value         |
| GDP               | Gross Domestic Product            |
| IPV               | Industrial Product Value          |
| IR                | Isozu region                      |
| SO <sub>2</sub>   | Sulfur Dioxide                    |
| SCE               | Standard Coal Energy              |
| MAC               | Monthly Average Concentration     |
| PM <sub>2.5</sub> | Fine Particulate Matter           |
| PM <sub>10</sub>  | Particulate Matter                |
| NO <sub>2</sub>   | Nitrogen Dioxide                  |
| O <sub>3</sub>    | Ozone                             |
| CO                | Carbon Monoxide                   |
| SPM               | Suspended Particulate Matter      |
| BTH               | Beijing-Tianjin-Hebei region      |
| EKC               | Environmental Kurznets Curve      |
| URS               | Urban Residential Source          |
| CTFS              | Centralized Treatment Facilities  |

**Table S2.** Elementary conditions and SO<sub>2</sub> related fundamentals of Yokkaichi (by 2018)

| Item                                         | Yokkaichi's condition                                         |
|----------------------------------------------|---------------------------------------------------------------|
| Area (km <sup>2</sup> )                      | 206.48                                                        |
| Population (2018)                            | 311 795                                                       |
| Population Density (2018)                    | 1510/km <sup>2</sup>                                          |
| Transportation                               | port, airport, train stations                                 |
| GDP (2018)                                   | 1867.1 billion JPY                                            |
| GDP per Capita (2018)                        | 3.8 million JPY                                               |
| Industry Development                         | Figure above                                                  |
| Air Pollutants Monitoring Stations           | 11                                                            |
| Original Sources of pollutants               | coal                                                          |
| Main Sources of Air Pollution period         | crude oil                                                     |
| Dominating industry during pollution process | petrochemical industry, mechanical industry, textile industry |
| Main pollutants in Early period              | SO <sub>2</sub>                                               |

**Table S3.** Elementary conditions and SO<sub>2</sub> related fundamentals of Tianjin (by 2018)

| Item                                         | Tianjin's fundamental condition             |
|----------------------------------------------|---------------------------------------------|
| Area (km <sup>2</sup> )                      | 11966.5                                     |
| Population                                   | 15 618 300                                  |
| Population Density                           | 1305/km <sup>2</sup>                        |
| Transportation                               | port, airport, train stations               |
| GDP                                          | 21674.6 billion JPY <sup>1</sup>            |
| GDP per Capita                               | 1.4 million JPY                             |
| Industry Development                         | Figure above                                |
| Air Pollutants Monitoring Stations           | 27                                          |
| Original Sources of pollutants               | Coal                                        |
| Main Sources of Air Pollution period         | Coal, crude oil                             |
| Dominating industry in pollution period      | Petrochemical industry, mechanical industry |
| Main pollutants in early period of pollution | SO <sub>2</sub> , PM <sub>2.5</sub>         |

**Table S4.** Summary of related important law, policies, regulations, and activities against Yokkaichi Air Pollution.

| Time   | Policies and Regulations |                                                                  | Citizens' Activities and Movements                                         |
|--------|--------------------------|------------------------------------------------------------------|----------------------------------------------------------------------------|
|        | Local government         | Central government                                               |                                                                            |
| 1960.4 |                          |                                                                  | The Shiohama Self-governing Union filed complaints                         |
| 1962.2 |                          |                                                                  | The Shiohama Area Union filed requests to the government                   |
| 1962.6 |                          | The announcement of "Law about regulation of discharge of smoke" |                                                                            |
| 1962.7 |                          |                                                                  | The Shiohama Area Union filed requests once again to prefecture government |
| 1963-  |                          |                                                                  | Citizen movements against pollution activated                              |

---

|         |                                                                                                                              |                                                                                |
|---------|------------------------------------------------------------------------------------------------------------------------------|--------------------------------------------------------------------------------|
| 1963.11 | “Yokkaichi area air pollution special investigative committee” started a field investigation against Yokkaichi Air Pollution |                                                                                |
| 1966.10 | “Yokkaichi antipollution measure council ordinance” established                                                              |                                                                                |
| 1967.7  | Announcement of “Mie Prefecture pollution control ordinance”                                                                 |                                                                                |
| 1967.8  | Announcement and implement of “Basic law for environmental pollution control”                                                |                                                                                |
| 1967.9  |                                                                                                                              | 9 patients of Yokkaichi Asthma co-filed lawsuit against 6 companies in complex |
| 1968.6  | Announcement of “Air pollution control law”                                                                                  |                                                                                |
| 1969.2  | “Sulfur oxide general emission standard” was approved                                                                        |                                                                                |
| 1970.4  | “Pollution Session of Diet”                                                                                                  |                                                                                |
| 1972.4  | Amendment and implement of “Mie Prefecture pollution control ordinance”                                                      |                                                                                |

---

|        |                                               |                                          |
|--------|-----------------------------------------------|------------------------------------------|
| 1972.7 | Yokkaichi pollution event of damages judgment |                                          |
| 1993   |                                               | Announcement of "Basic Environment Law"  |
| 1993   |                                               | The concept of "Sustainable Development" |

**Table S5.** Summary of related important law, policies, regulations, and activities against air pollution in China.

| Time | Policies and Regulations                                                   |                                                                                       | Citizens' Activities and Movements                                  |
|------|----------------------------------------------------------------------------|---------------------------------------------------------------------------------------|---------------------------------------------------------------------|
|      | Local government                                                           | Central government                                                                    |                                                                     |
| 1988 |                                                                            | Announcement of "Law of China on the Prevention and Control of Atmospheric Pollution" |                                                                     |
| 1998 | "Coal to Gas" Project initiated in Beijing                                 |                                                                                       |                                                                     |
| 2003 |                                                                            | Announcement of "The Environmental Impact Assessment Law of China"                    |                                                                     |
| 2008 |                                                                            |                                                                                       | "Beijing Olympics" and Discussion over "Political Blue Sky" Concept |
| 2013 |                                                                            | Implementation of "Air Pollution Prevention and Control Action Plan"                  | Public discussion over PM <sub>2.5</sub>                            |
| 2014 | Implementation of "Beijing-Tianjin-Hebei Integration Development Strategy" |                                                                                       |                                                                     |
| 2015 | Implementation of "Air Pollution Prevention Regulations of Tianjin"        |                                                                                       | Public discussion over PM <sub>2.5</sub> (second time)              |
| 2016 |                                                                            | Amendment of "Law of China on the Prevention and Control of Atmospheric Pollution"    |                                                                     |
| 2017 | "Coal to Gas" project promoted to Beijing-Tianjin-Hebei area               |                                                                                       |                                                                     |

**Table S6.** Standards for 6 main pollutants in Japan

| Pollutant         | Averaging period | Concentration | Unit               |
|-------------------|------------------|---------------|--------------------|
| SO <sub>2</sub>   | 1 hour           | 0.1           | ppm                |
|                   | 24 hours         | 0.04          |                    |
| CO                | 8 hours          | 20            | ppm                |
|                   | 24 hours         | 10            |                    |
| SPM               | 1 hour           | 0.20          | mg/m <sup>3</sup>  |
|                   | 24 hours         | 0.10          |                    |
| NO <sub>2</sub>   | 24 hours         | 0.04-0.06     | ppm                |
| O <sub>3</sub>    | 1 hour           | 0.06          |                    |
| PM <sub>2.5</sub> | 24 hours         | 35            | μ g/m <sup>3</sup> |
|                   | 1 year           | 15            |                    |

Source: <https://www.env.go.jp/kijun/taiki.html>

**Table S7.** Legal standards for 6 main pollutants' concentration in China

| Pollutant         | Averaging period | Concentration |         | Unit               |
|-------------------|------------------|---------------|---------|--------------------|
|                   |                  | Level 1       | Level 2 |                    |
| SO <sub>2</sub>   | 1 year           | 20            | 60      | μ g/m <sup>3</sup> |
|                   | 24 hours         | 50            | 150     |                    |
|                   | 1 hour           | 150           | 500     |                    |
| NO <sub>2</sub>   | 1 year           | 40            | 40      | μ g/m <sup>3</sup> |
|                   | 24 hours         | 80            | 80      |                    |
|                   | 1 hour           | 200           | 200     |                    |
| CO                | 24 hours         | 4             | 4       | mg/m <sup>3</sup>  |
|                   | 1 hour           | 10            | 10      |                    |
| O <sub>3</sub>    | 8 hours          | 100           | 160     | μ g/m <sup>3</sup> |
|                   | 1 hour           | 160           | 200     |                    |
| PM <sub>10</sub>  | 1 year           | 40            | 70      | μ g/m <sup>3</sup> |
|                   | 24 hours         | 50            | 150     |                    |
| PM <sub>2.5</sub> | 1 year           | 15            | 35      | μ g/m <sup>3</sup> |
|                   | 24 hours         | 35            | 75      |                    |

Source: Ministry of Ecology and Environment of the People's Republic of China

## Supplementary tables and figures for Yokkaichi linear analysis:

**Table S8.** Detailed linear fitting analysis data for evaluating dataset of Yokkaichi for **Table 6**.

| Variable                | Ln ( <i>I</i> (yc)) | Ln ( <i>P</i> (yc)) | Ln ( <i>A</i> (yc)) | Ln ( <i>T</i> (yc)) | Ln ( <i>B</i> (yc)) | Ln ( <i>S</i> (yc)) |
|-------------------------|---------------------|---------------------|---------------------|---------------------|---------------------|---------------------|
| N total                 | 10                  | 10                  | 10                  | 10                  | 10                  | 10                  |
| Mean                    | -6.24338            | 5.74733             | 19.42844            | -3.11459            | 4.29667             | -0.84157            |
| Standard Deviation      | 0.42131             | 0.0047              | 0.12379             | 0.04697             | 0.39139             | 0.15325             |
| Mean absolute Deviation | 0.26575             | 0.00357             | 0.09437             | 0.03799             | 0.27034             | 0.13631             |
| Minimum                 | -6.90776            | 5.73874             | 19.22298            | -3.18885            | 3.43399             | -1.03564            |
| Median                  | -6.21461            | 5.74831             | 19.40839            | -3.10675            | 4.27667             | -0.83298            |
| Maximum                 | -5.52146            | 5.75195             | 19.63141            | -3.04834            | 4.80402             | -0.65201            |
| Range                   | 1.38629             | 0.01321             | 0.40843             | 0.14051             | 1.37003             | 0.38363             |

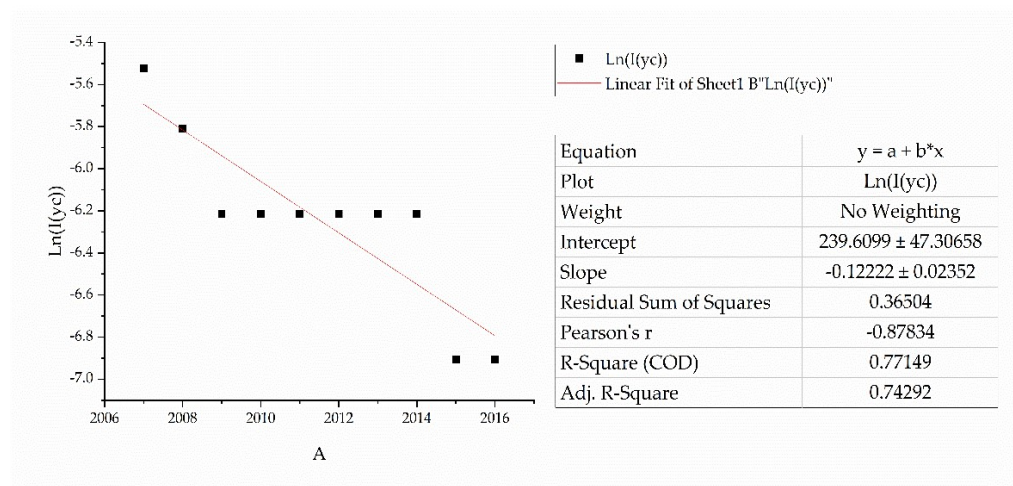

**Figure S1.** Linear regression of Year- $\text{Ln}(I(yc))$ .

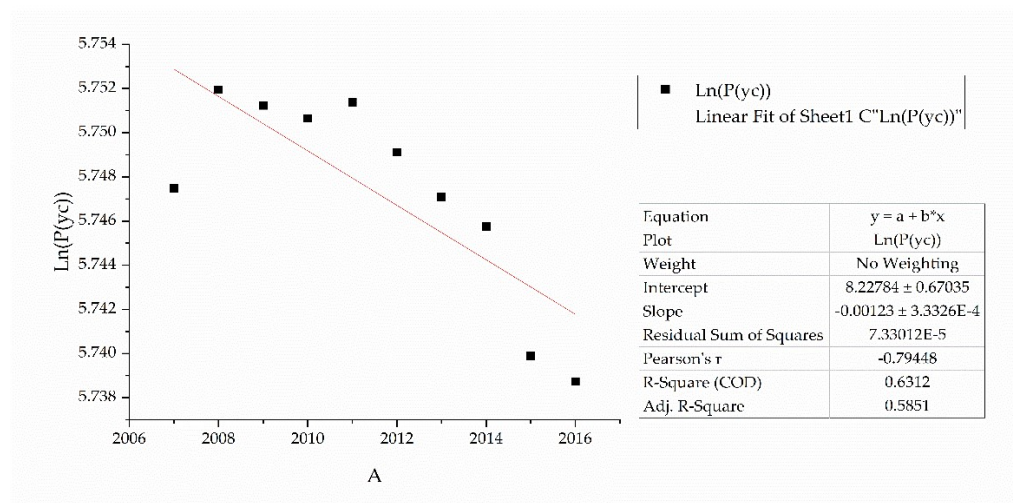

**Figure S2.** Linear regression of Year- $\text{Ln}(P(yc))$ .

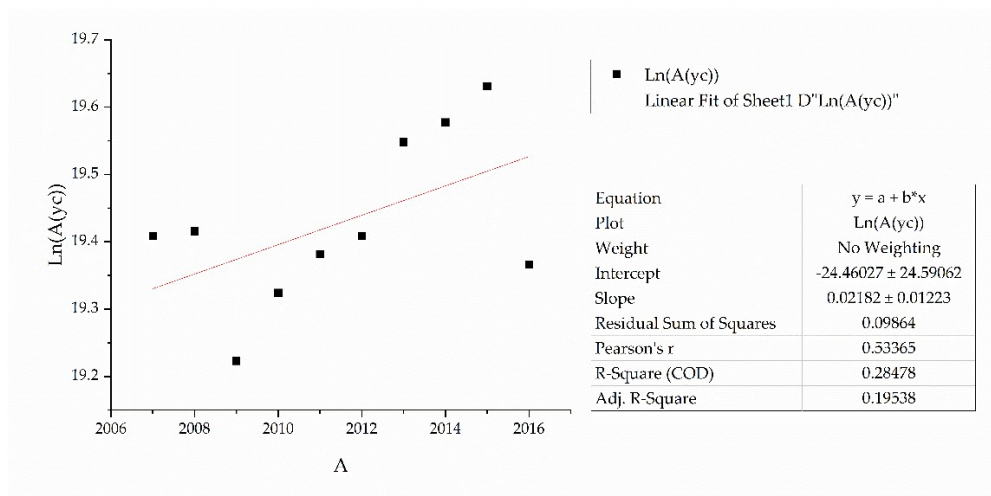

**Figure S3.** Linear regression of Year- $\text{Ln}(A(y))$ .

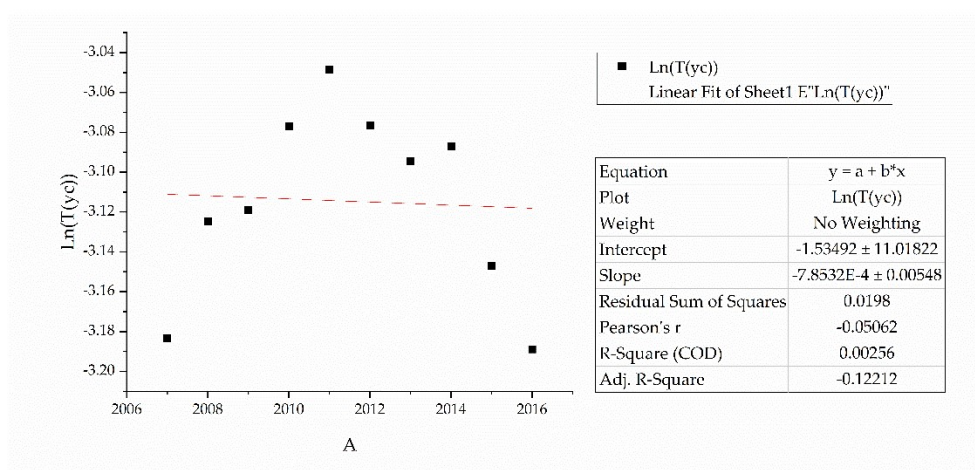

**Figure S4.** Linear regression of Year- $\text{Ln}(T(y))$ .

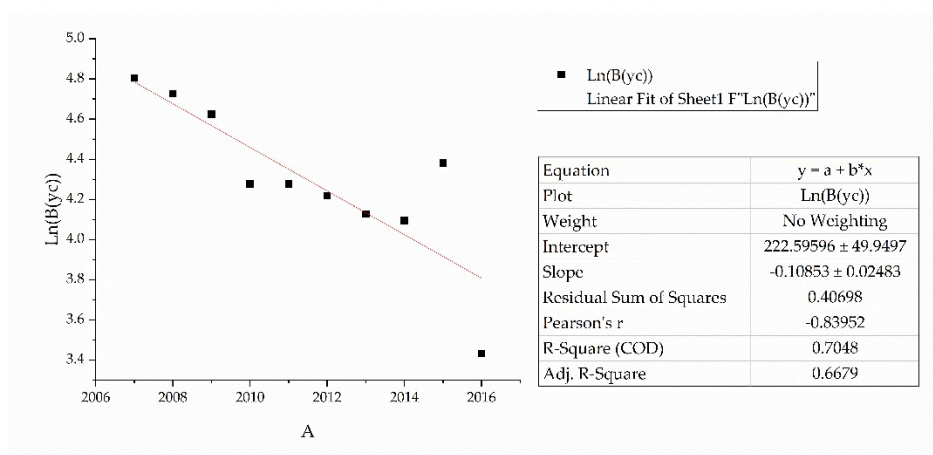

**Figure S5.** Linear regression of Year- $\text{Ln}(B(y))$ .

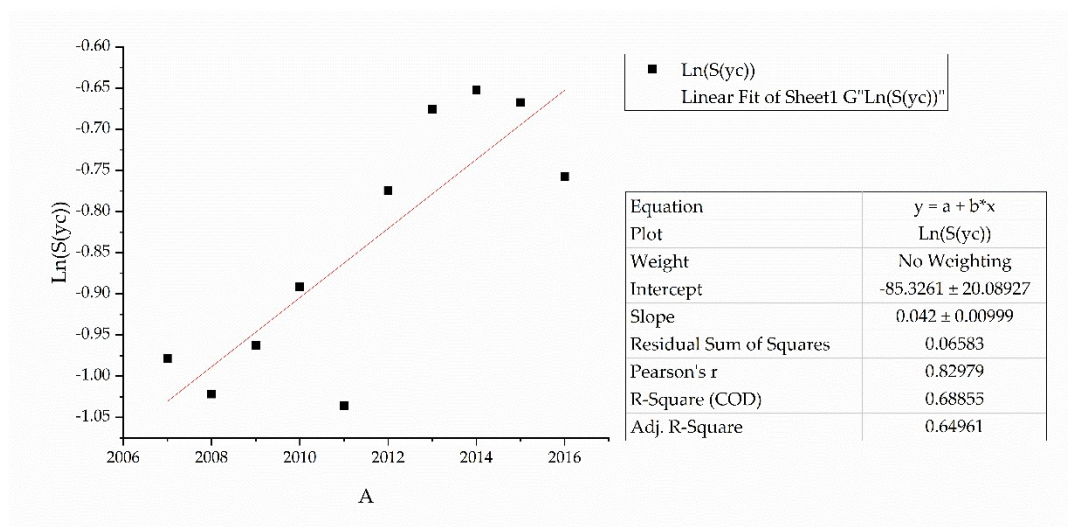

**Figure S6.** Linear regression of Year-Ln(S(yc)).



## Supplementary tables and figures for Tianjin linear analysis:

**Table S9.** Detailed linear fitting analysis data for evaluating dataset of Tianjin for **Table 9**.

| Variable                | $\text{Ln}(I(tj))$ | $\text{Ln}(P(tj))$ | $\text{Ln}(A(tj))$ | $\text{Ln}(T(tj))$ | $\text{Ln}(B(tj))$ | $\text{Ln}(S(tj))$ |
|-------------------------|--------------------|--------------------|--------------------|--------------------|--------------------|--------------------|
| N total                 | 5                  | 5                  | 5                  | 5                  | 5                  | 5                  |
| Mean                    | 3.11223            | 7.34496            | 13.46135           | -4.53735           | 4.46668            | -0.861             |
| Standard Deviation      | 0.54459            | 0.0121             | 0.02914            | 1.04421            | 0.56528            | 0.06177            |
| Mean Absolute Deviation | 0.41387            | 0.00861            | 0.0243             | 0.74324            | 0.43706            | 0.04358            |
| Minimum                 | 2.48491            | 7.32436            | 13.4306            | -5.12854           | 3.71357            | -0.90387           |
| Median                  | 3.04452            | 7.35043            | 13.45349           | -4.89605           | 4.57471            | -0.89404           |
| Maximum                 | 3.89182            | 7.3538             | 13.49691           | -2.67925           | 5.18178            | -0.75502           |
| Range                   | 1.40691            | 0.02943            | 0.06631            | 2.44929            | 1.46821            | 0.14885            |

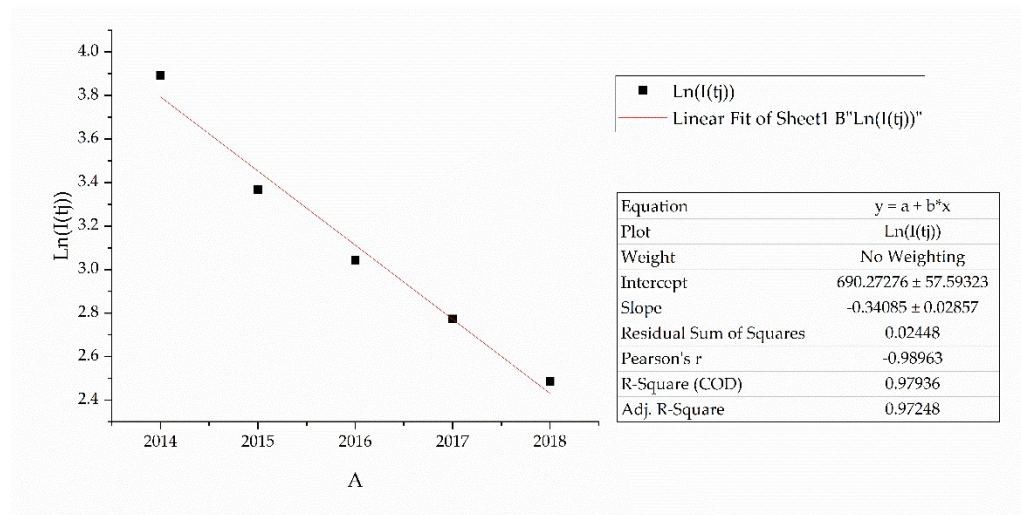

**Figure S7.** Linear regression of Year- $\text{Ln}(I(tj))$ .

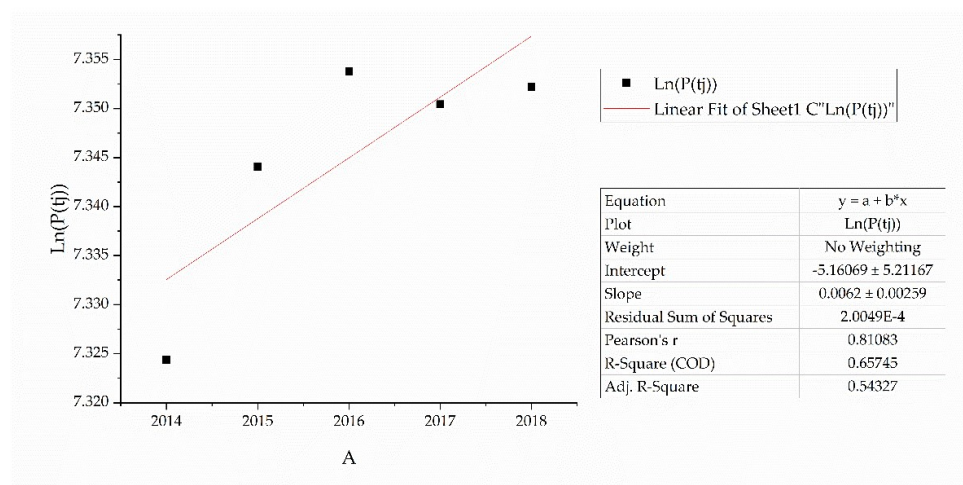

**Figure S8.** Linear regression of Year- $\text{Ln}(P(tj))$ .

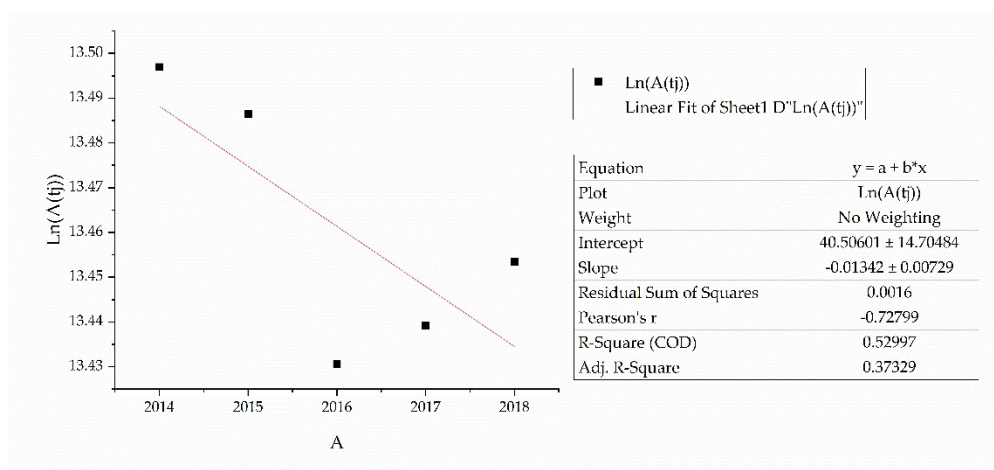

Figure S9. Linear regression of Year- $\ln(A(tj))$ .

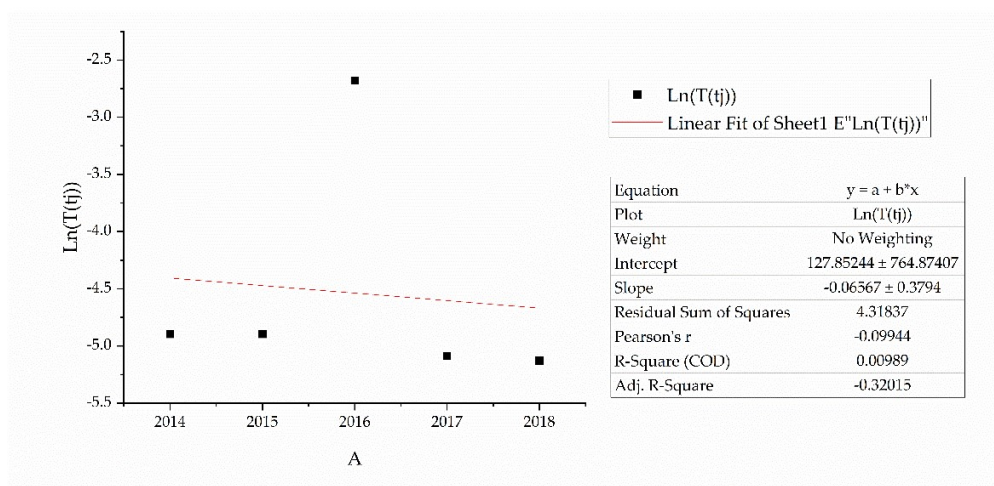

Figure S10. Linear regression of Year- $\ln(T(tj))$

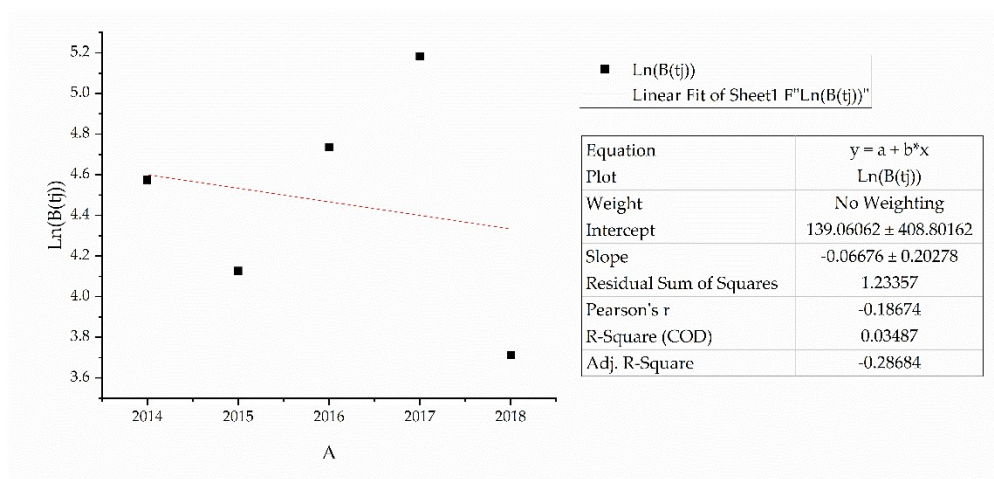

Figure S11. Linear regression of Year- $\ln(B(tj))$ .

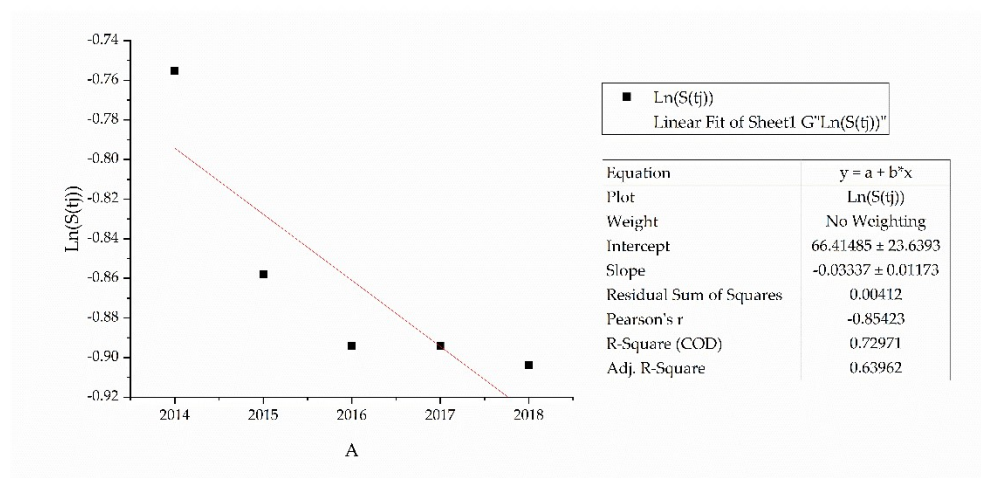

**Figure S12.** Linear regression of Year- $\text{Ln}(S(tj))$ .
