# Supplementary material for: Adaption to Tianjin, China, Based on a Retrospective Pattern Study on the Petrochemical Industry Development and the Correlated Process of SO2 Abatement in Yokkaichi, Japan
Source: MDPI journal article supplement (doi:10.3390/su15010498), 2022-12-28
Supplement: s1 [file s1]

Archive with 1 entries (1 files):
- sustainability-2056279-Supplementary materials.pdf
